# Supplementary material for: A BODIPY-based colorimetric and fluorometric chemosensor for Hg(ii) ions and its application to living cell imaging
Source: Royal Society of Chemistry journal article supplement (doi:10.1039/c2ob25589h), 2012-01-01
Supplement: c2ob25589h.pdf [file c2ob25589h.pdf]

**Supplementary data for:**

**A BODIPY-based Colorimetric and Fluorometric Chemosensor for Hg(II) Ions  
and its Application to Living Cell Imaging**

Mani Vedamalai and Shu-Pao Wu\*

*Department of Applied Chemistry, National Chiao Tung University, Hsinchu, Taiwan  
300, Republic of China*

Tel.: +886-3-5712121-ext56506

Fax: +886-3-5723764

E-mail: spwu@mail.nctu.edu.tw

**Contents**

1. **Figure S1.**  $^1\text{H}$  NMR spectra (300 MHz) of compound **2** in  $\text{CD}_3\text{OD}$ .
2. **Figure S2.**  $^{13}\text{C}$  NMR spectra (75 MHz) of compound **2** in  $\text{CD}_3\text{OD}$
3. **Figure S3.**  $^1\text{H}$  NMR spectra (500 MHz) of compound **3** in  $\text{CD}_2\text{Cl}_2$ .
4. **Figure S4.**  $^{13}\text{C}$  NMR spectra (125 MHz) of compound **3** in  $\text{CD}_2\text{Cl}_2$
5. **Figure S5.**  $^1\text{H}$  NMR spectra (600 MHz) of compound **4** in  $\text{CD}_2\text{Cl}_2$
6. **Figure S6.**  $^{13}\text{C}$  NMR spectra (150 MHz) of compound **4** in  $\text{CD}_2\text{Cl}_2$
7. **Figure S7.**  $^1\text{H}$  NMR spectra (300 MHz) of **5** in  $\text{CD}_3\text{CN}$ .
8. **Figure S8.**  $^{13}\text{C}$  NMR spectra (75 MHz) of **5** in  $\text{CD}_3\text{CN}$ .
9. **Figure S9.**  $^1\text{H}$  NMR spectra (500 MHz) of **MS1** in  $\text{CD}_3\text{CN}$ .
10. **Figure S10.**  $^{13}\text{C}$  NMR spectra (125 MHz) of **MS1** in  $\text{CD}_3\text{CN}$ .
11. **Figure S11.** ESI-Mass of **MS1**- $\text{Hg}^{2+}$  complex.
12. **Figure S12.** Calibration curve of **MS1**- $\text{Hg}^{2+}$  in acetonitrile-water ( $v/v = 9/1$ , 2.5 mM Hepes, pH 7.0) solutions.

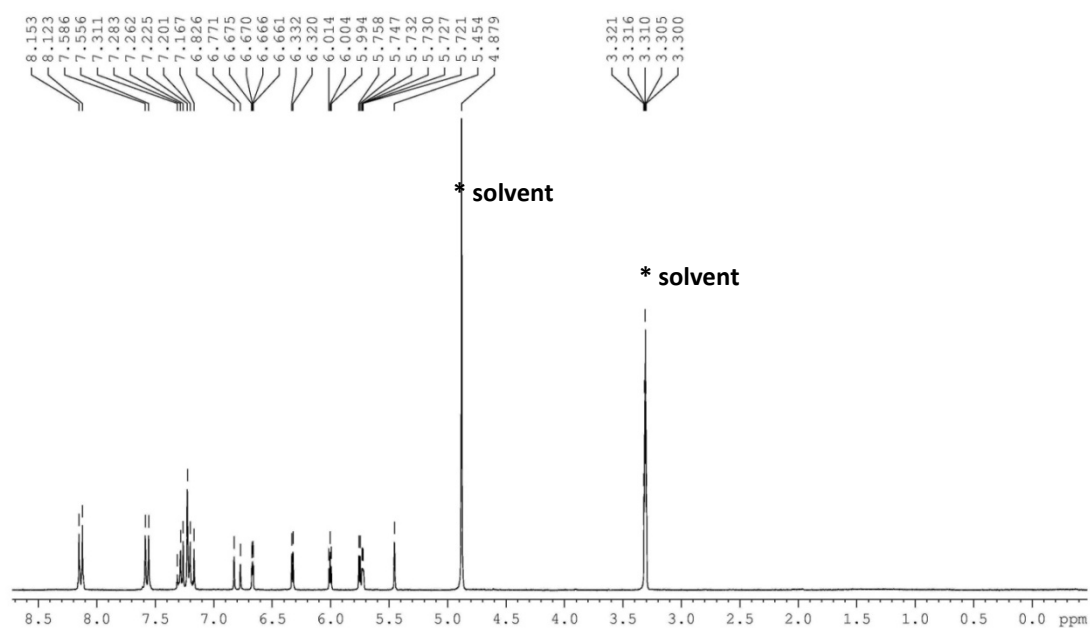

Figure S1.  $^1\text{H}$  NMR spectra (300 MHz) of compound **2** in  $\text{CD}_3\text{OD}$ .

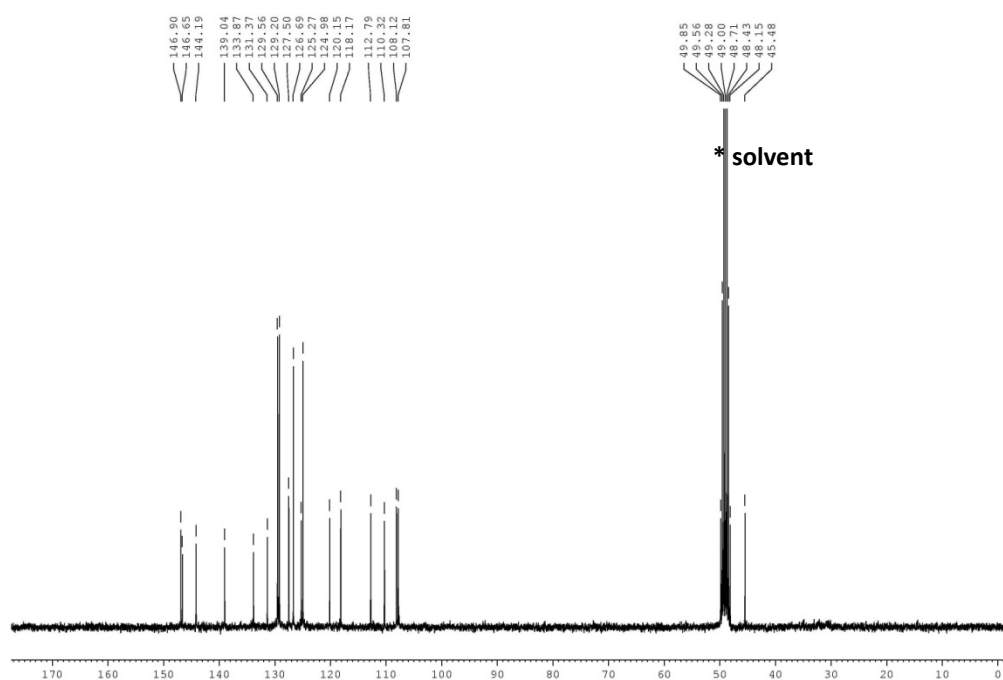

Figure S2.  $^{13}\text{C}$  NMR spectra (75 MHz) of compound **2** in  $\text{CD}_3\text{OD}$ .

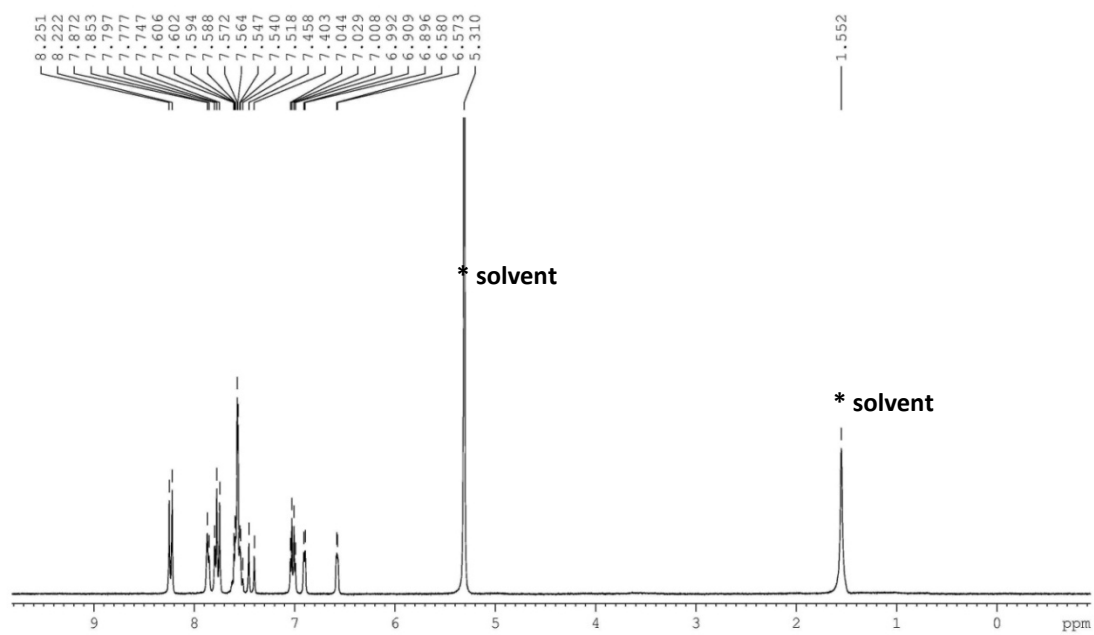

Figure S3.  $^1\text{H}$  NMR spectra (500 MHz) of compound **3** in  $\text{CD}_2\text{Cl}_2$ .

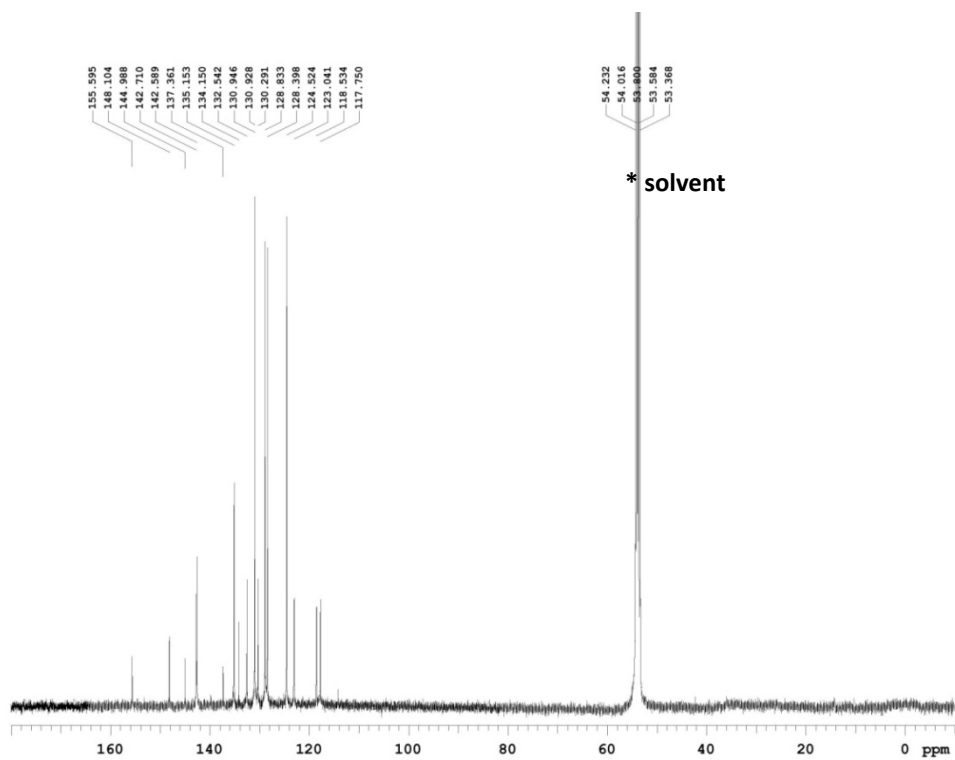

Figure S4.  $^{13}\text{C}$  NMR spectra (125 MHz) of compound **3** in  $\text{CD}_2\text{Cl}_2$ .

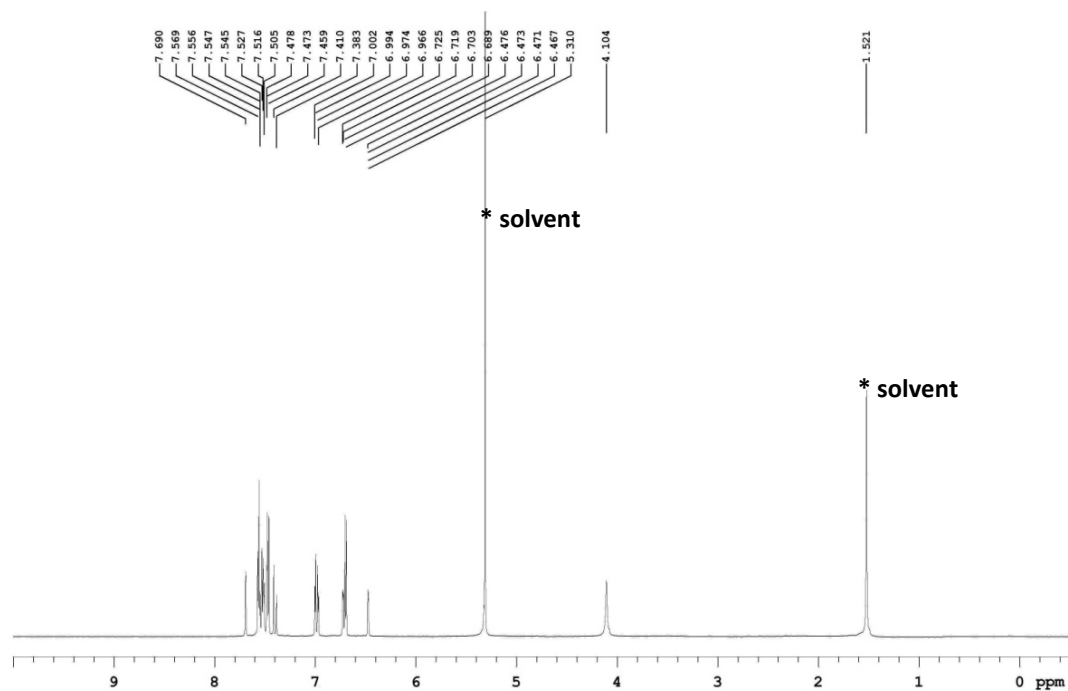

Figure S5.  $^1\text{H}$  NMR spectra (600 MHz) of compound **4** in  $\text{CD}_2\text{Cl}_2$

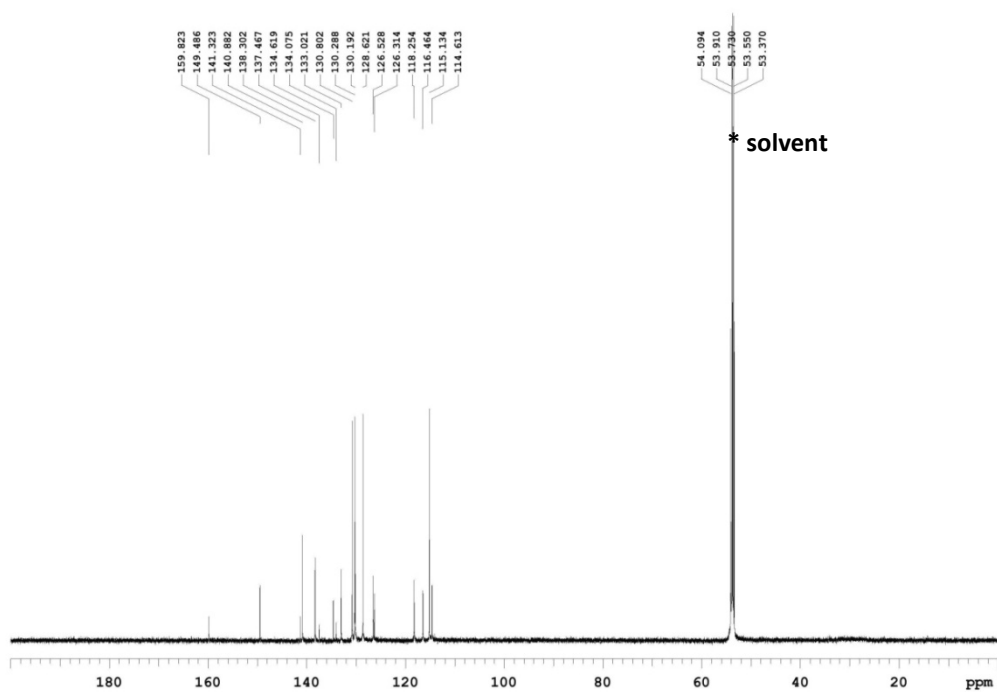

Figure S6.  $^{13}\text{C}$  NMR spectra (150 MHz) of compound **4** in  $\text{CD}_2\text{Cl}_2$

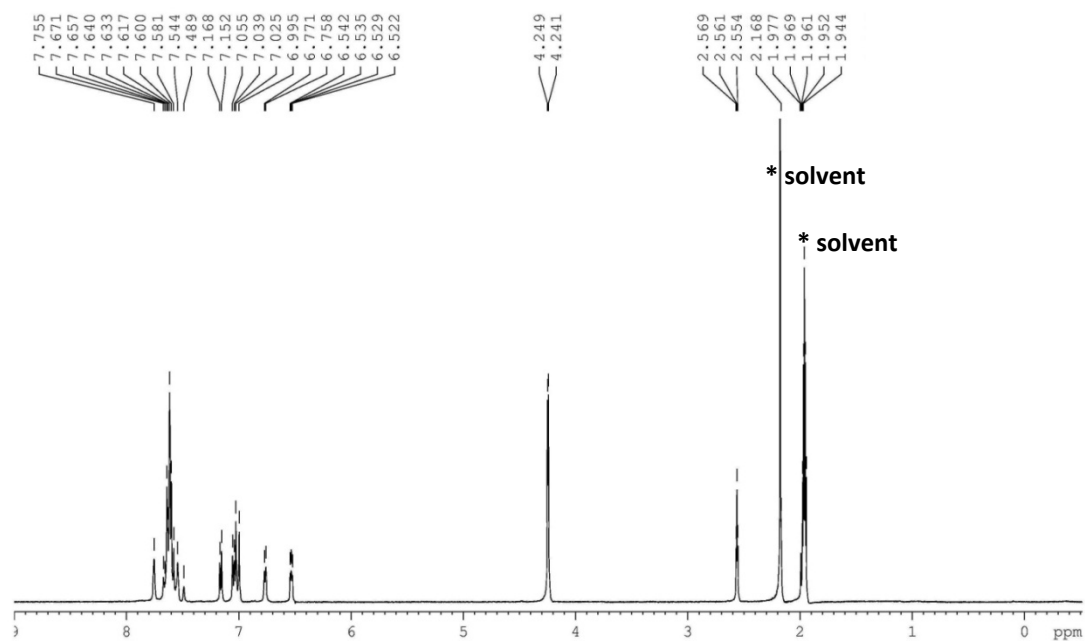

Figure S7.  $^1\text{H}$  NMR spectra (300 MHz) of **5** in  $\text{CD}_3\text{CN}$ .

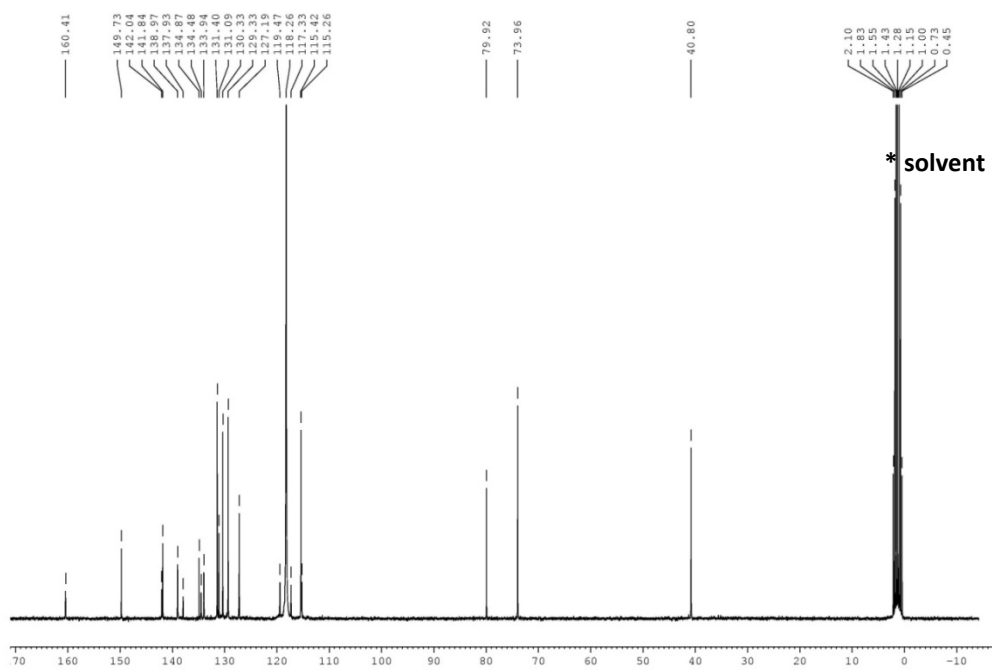

Figure S8.  $^{13}\text{C}$  NMR spectra (75 MHz) of **5** in  $\text{CD}_3\text{CN}$ .

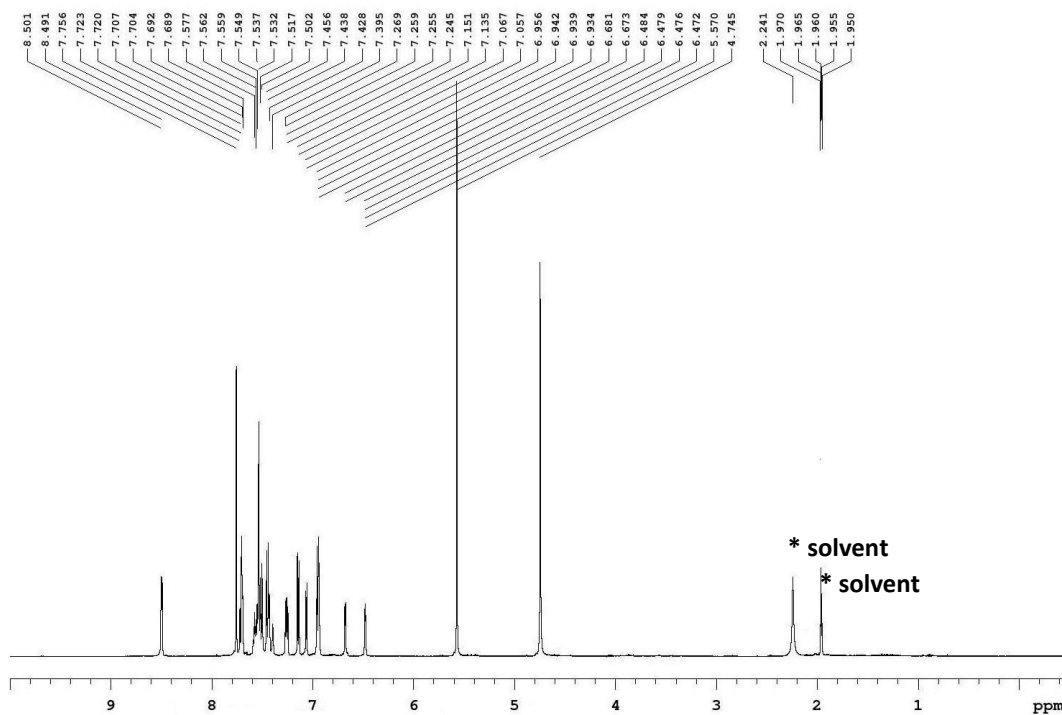

Figure S9.  $^1\text{H}$  NMR spectra (500 MHz) of MS1 in  $\text{CD}_3\text{CN}$ .

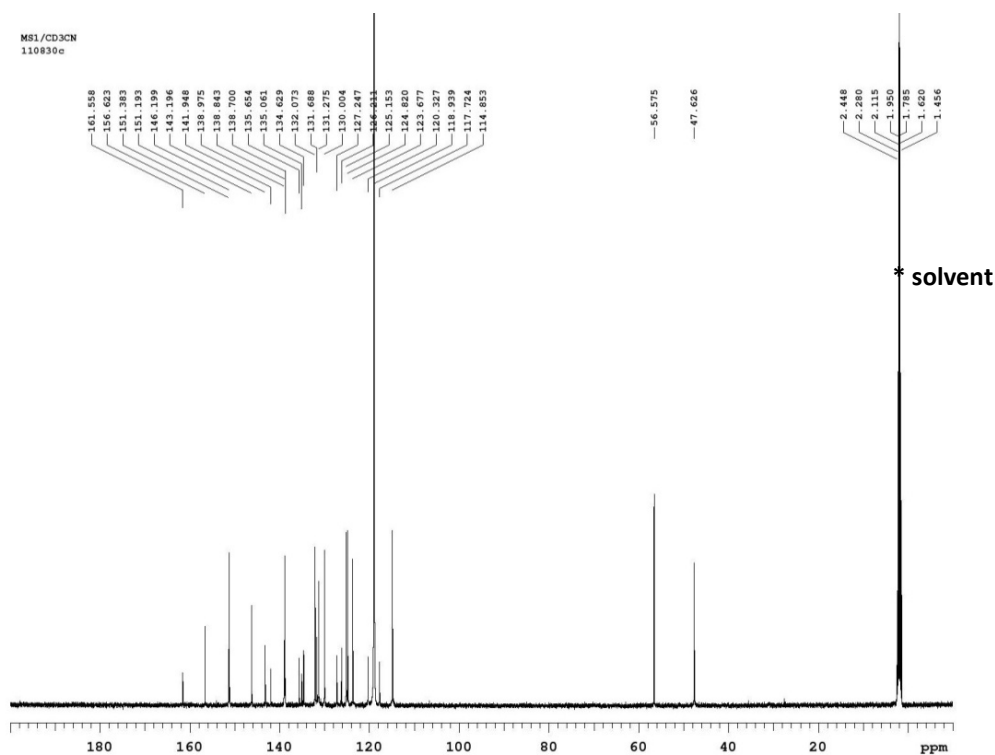

Figure S10.  $^{13}\text{C}$  NMR spectra (125 MHz) of MS1 in  $\text{CD}_3\text{CN}$ .

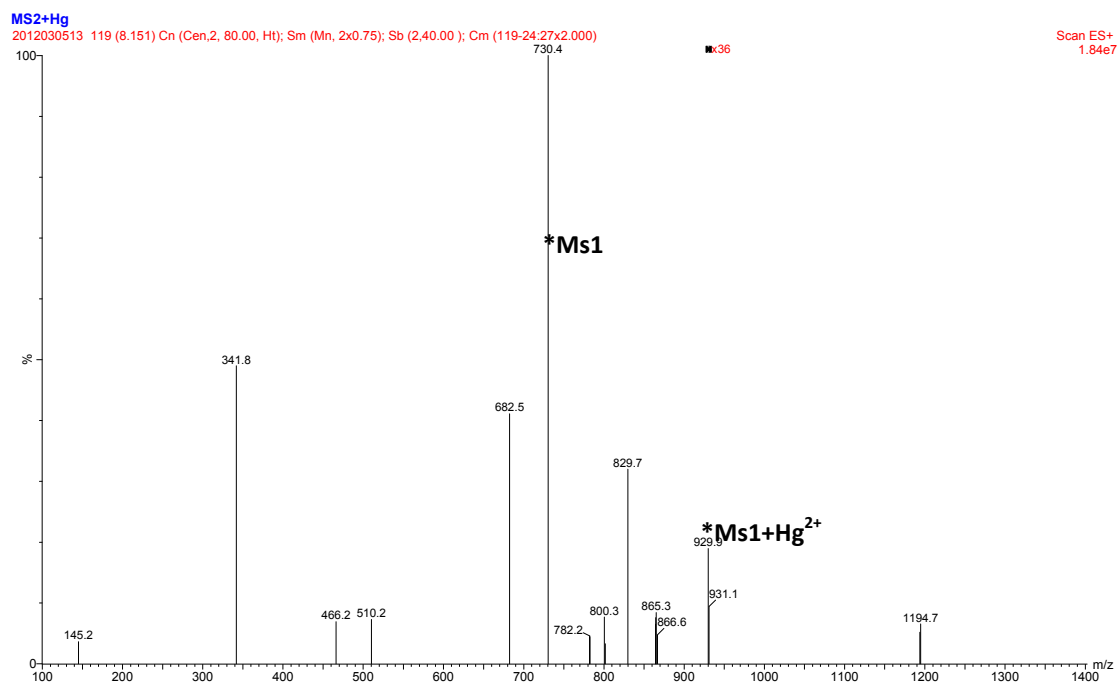

**Figure S11.** ESI-Mass of MS1-Hg<sup>2+</sup> complex.

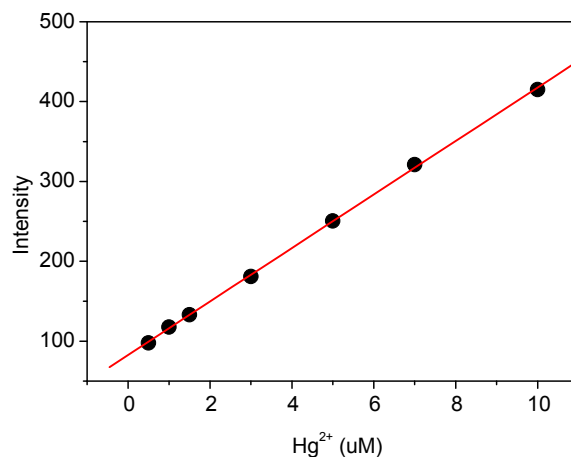

**Figure S12.** Calibration curve of **MS1**-Hg<sup>2+</sup> in acetonitrile-water (v/v = 9/1, 2.5 mM HEPES, pH 7.0) solutions. The excitation wavelength was 550 nm, and the monitored emission wavelength was 650 nm.

Linear Regression Data

$$Y = A + S * X$$

| Parameter | Value    | Error   | R       | SD      | N | P       |
|-----------|----------|---------|---------|---------|---|---------|
| A         | 82.56453 | 1.51151 | 0.99981 | 2.52755 | 7 | <0.0001 |
| S         | 33.51315 | 0.29283 |         |         |   |         |

The detection limit (DL) of Hg<sup>2+</sup> ions using chemosensor **MS1** was determined from the following equation:

$$DL = K * SD / S$$

Where K = 3: SD is the standard deviation of the blank solution; S is the slope of the calibration curve.  $DL = 3 * 2.52755 / 33.51315 = 0.226 \text{ (}\mu\text{M)}$
